# Supplementary material for: Estrogen receptor α phosphorylated at Ser216 confers inflammatory function to mouse microglia
Source: PubMed Central journal article supplement (PMC7390202; doi:10.1186/s12964-020-00578-x), 2020-07-29
Supplement: 12964_2020_578_MOESM2_ESM.pdf [file 12964_2020_578_MOESM2_ESM.pdf]

**Additional file 1 information**

**Estrogen receptor  $\alpha$  phosphorylated at Ser216 confers inflammatory function to mouse microglia**

Sawako Shindo, Shih-Heng Chen, Saki Gotoh, Kosuke Yokobori, Hao Hu, Manas Ray, Rick Moore, Kiyoshi Nagata, Jennifer Martinez, Jau-Shyong Hong, Masahiko Negishi
